# Supplementary material for: Plasma-Etched Vertically Aligned CNTs with Enhanced Antibacterial Power
Source: MDPI journal article supplement (doi:10.3390/nano13061081), 2023-03-16
Supplement: s1 [file s1]

# Plasma-Etched Vertically Aligned CNTs with Enhanced Antibacterial Power

Emily Schifano <sup>1,2</sup>, Gianluca Cavoto <sup>3,4</sup>, Francesco Pandolfi <sup>4</sup>, Giorgio Pettinari <sup>5</sup>, Alice Apponi <sup>6</sup>,  
Alessandro Ruocco <sup>6</sup>, Daniela Uccelletti <sup>1,2</sup>, Ilaria Rago <sup>3,4,\*</sup>

<sup>1</sup> Dipartimento di Biologia e Biotecnologia “C. Darwin”, Sapienza University of Rome, Piazzale Aldo Moro 5, 00185 Rome, Italy

<sup>2</sup> SNN Lab, Sapienza Nanotechnology & Nano-Science Laboratory, Sapienza University of Rome, 00100 Rome, Italy

<sup>3</sup> Dipartimento di Fisica, Sapienza Università di Roma, Piazzale Aldo Moro 2, 00185 Rome, Italy

<sup>4</sup> INFN Sezione di Roma, Piazzale Aldo Moro 2, 00185 Rome, Italy

<sup>5</sup> Istituto di Fotonica e Nanotecnologie, CNR-IFN, Via del Fosso del Cavaliere 100, 00133 Rome, Italy

<sup>6</sup> Dipartimento di Scienze, Università Degli Studi Roma Tre and INFN Sezione di Roma Tre, Via della Vasca Navale 84, 00146 Rome, Italy

\* Correspondence: [ilaria.rago@uniroma1.it](mailto:ilaria.rago@uniroma1.it)

**Table S1.** Optimization of plasma treatment conditions.

| Identifier | Ar<br>[sccm] | O <sub>2</sub><br>[sccm] | Pressure<br>[mTorr] | Power<br>[W] | Time<br>[min] |
|------------|--------------|--------------------------|---------------------|--------------|---------------|
| 1          | 0            | 195                      | 1                   | 33           | 1             |
| 2          | 0            | 66                       | 40                  | 100          | 1             |
| 3          | 0            | 66                       | 40                  | 100          | 2             |
| 4          | 52           | 14                       | 40                  | 80           | 1             |
| 5          | 52           | 14                       | 40                  | 80           | 5             |
| 6          | 20           | 5                        | 70                  | 50           | 5             |
| 7          | 20           | 5                        | 100                 | 50           | 5             |
| 8          | 10           | 2                        | 200                 | 50           | 5             |
| 9          | 10           | 2                        | 200                 | 35           | 5             |

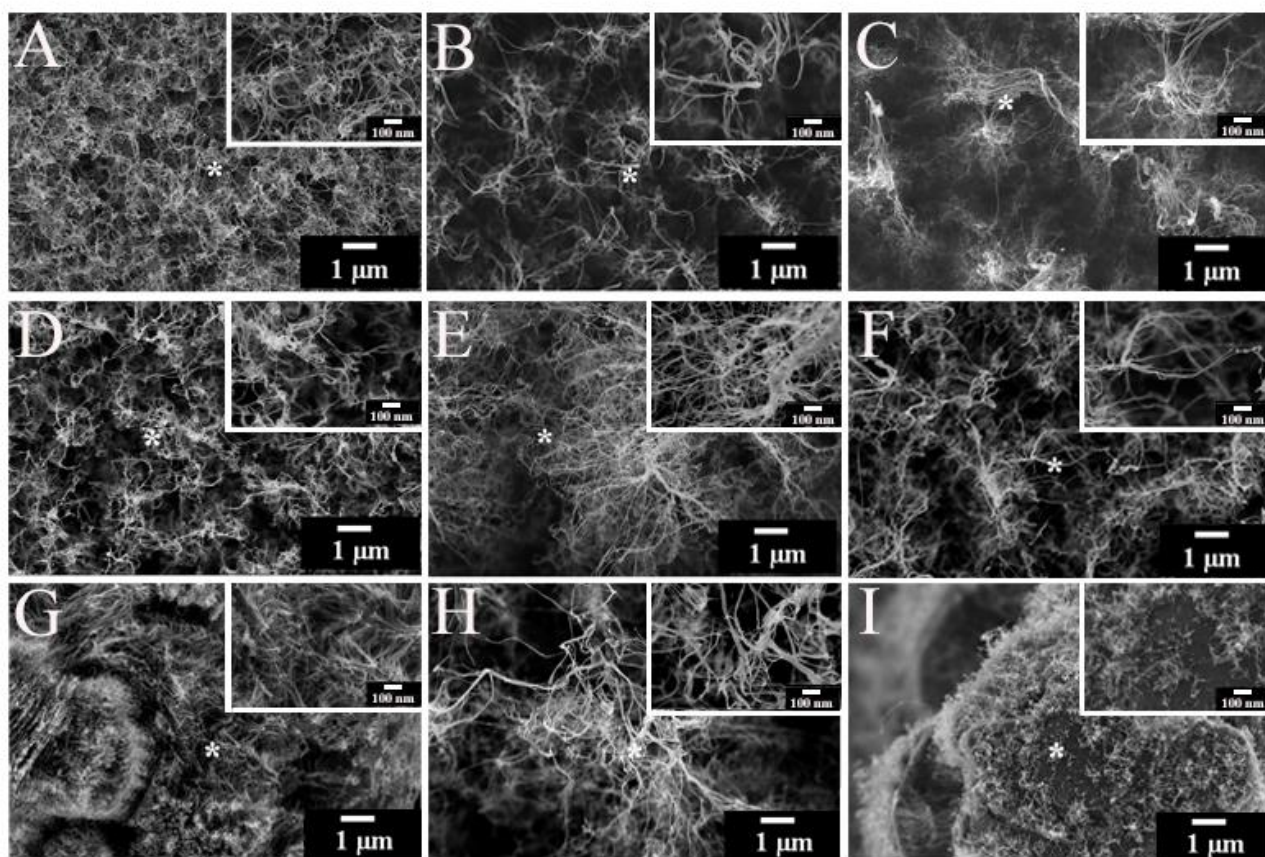

**Figure S1.** (A-I) Top view SEM micrographs of VA-CNTs modified with different plasma etching conditions showing the morphology of: (A) sample 1 in Table S1 where no significant morphological alterations occur and the crust layer seems to be still present over the surface of CNT mats (*i.e.* “light” etching), (B-C) samples identified as 2 and 3 in Table S1 in which the uniform layer of randomly oriented CNTs (*i.e.* crust layer) switches to a more spiky CNTs arrangement, categorized as “aggressive” etching, (D-H) samples 4-8, upon which significant morphological and structural alterations emerge, (I) sample 9 where the crust is removed and the structural integrity of CNT forests is maintained, identified as “modest” etching.
